# Supplementary material for: Acetalization of aldehydes and ketones over H4[SiW12O40] and H4[SiW12O40]/SiO2
Source: Royal Society of Chemistry journal article supplement (doi:10.1039/c4cy00021h), 2014-01-01
Supplement: c4cy00021h1.pdf [file c4cy00021h1.pdf]

*Supporting Information for:*

## Acetalization of Aldehydes and Ketones over $H_4[SiW_{12}O_{40}]$ and $H_4[SiW_{12}O_{40}]/SiO_2$

Shen Zhao, Yueqing Jia, Yu-Fei Song\*

*State Key Laboratory of Chemical Resource Engineering, Beijing University of Chemical Technology, Beijing 100029,  
P. R. China.*

### List of contents

**Table S1.** ICP analysis of H-SiW<sub>12</sub>, fresh H-SiW<sub>12</sub>/SiO<sub>2</sub> and reused H-SiW<sub>12</sub>/SiO<sub>2</sub>.

**Table S2.** Assignments of FT-IR spectra of H-SiW<sub>12</sub>, SiO<sub>2</sub> and H-SiW<sub>12</sub>/SiO<sub>2</sub>.

**Table S3.** Assignments of <sup>29</sup>Si CP/MAS NMR spectra of H-SiW<sub>12</sub>, SiO<sub>2</sub> and H-SiW<sub>12</sub>/SiO<sub>2</sub>.

**Table S4.** The yields at different temperature and E<sub>a</sub> for acetalization of various substrates with ethylene glycol catalyzed by H-SiW<sub>12</sub> under solvent-free conditions.

**Table S5.** Acetalization of various aldehydes and ketones with 1,3-propanediol catalyzed by H-SiW<sub>12</sub> at 60 °C under solvent-free conditions.

**Table S6.** Acetalization of various aldehydes and ketones with 1,3-propanediol catalyzed by H-SiW<sub>12</sub>/SiO<sub>2</sub> at 60 °C under solvent-free conditions.

**Table S7.** ICP analysis of reaction filtrate before and after reaction catalyzed by H-SiW<sub>12</sub>.

**Table S8.** ICP analysis of reaction filtrate before and after reaction catalyzed by H-SiW<sub>12</sub>/SiO<sub>2</sub>.

**Table S9.** H-SiW<sub>12</sub>/SiO<sub>2</sub>-recycling and reusing experiments of acetalization of benzaldehyde with 1,3-propanediol.

**Figure S1.** Yield and ln(C<sub>t</sub>/C<sub>0</sub>) as functions of reaction time at (A) 25 °C, (B) 40 °C, (C) 50 °C, (D) 60 °C and (E) 70 °C. Reaction conditions: cyclohexanone (1 mmol), H-SiW<sub>12</sub> (0.25 mol% to cyclohexanone), ethylene glycol (1.5 mmol), 6 hours.

**Figure S2.** Yield and ln(C<sub>t</sub>/C<sub>0</sub>) as functions of reaction time at (A) 25 °C, (B) 40 °C, (C) 50 °C, (D) 60 °C and (E) 70 °C. Reaction conditions: 2-methylbenzaldehyde (1 mmol), H-SiW<sub>12</sub> (0.25 mol% to 2-methylbenzaldehyde), ethylene glycol (1.5 mmol), 6 hours.

**Figure S3.** Powder XRD patterns (A) and FT-IR spectra (B) of H-SiW<sub>12</sub>/SiO<sub>2</sub>, SiO<sub>2</sub> and H-SiW<sub>12</sub>.

**Figure S4.** Adsorption-desorption isotherms (A) and pore size distribution curves (B) of H-SiW<sub>12</sub>/SiO<sub>2</sub>, SiO<sub>2</sub> and H-SiW<sub>12</sub>.

**Figure S5.** NH<sub>3</sub>-TPD profiles of H-SiW<sub>12</sub>/SiO<sub>2</sub> and H-SiW<sub>12</sub>.

**Figure S6.** The proposed mechanism of acetalization of aldehydes and ketones with diols (ethylene glycol and 1,3-propanediol) catalyzed by H-SiW<sub>12</sub> and H-SiW<sub>12</sub>/SiO<sub>2</sub>.

**Table S1.** ICP analysis of of H-SiW<sub>12</sub>, fresh H-SiW<sub>12</sub>/SiO<sub>2</sub> and reused H-SiW<sub>12</sub>/SiO<sub>2</sub>.

| Catalyst                                     | Found (%) | Calcd. (%) |
|----------------------------------------------|-----------|------------|
|                                              | W         | W          |
| H-SiW <sub>12</sub>                          | 76.48     | 76.65      |
| fresh H-SiW <sub>12</sub> /SiO <sub>2</sub>  | 6.92      | 6.98       |
| reused H-SiW <sub>12</sub> /SiO <sub>2</sub> | 6.90      | 6.98       |

**Table S2.** Assignments of FT-IR spectra of H-SiW<sub>12</sub>, SiO<sub>2</sub> and H-SiW<sub>12</sub>/SiO<sub>2</sub>.<sup>a</sup>

| H-SiW <sub>12</sub> | SiO <sub>2</sub> | H-SiW <sub>12</sub> /SiO <sub>2</sub> | Assignments                    |
|---------------------|------------------|---------------------------------------|--------------------------------|
| 3445                | 3448             | 3436                                  | O-H asym. str.                 |
| 2926                | 2925             | 2927                                  | O-H scissoring                 |
| 1100                | 1097             | 1102                                  | Si-O asym. str.                |
| 1046                |                  |                                       | W-O <sub>d</sub> scissoring    |
| 934                 |                  | 935                                   | W-O <sub>d</sub> asym. str.    |
| 891                 |                  | 893                                   | W-O <sub>b</sub> -W asym. str. |
| 790                 |                  | 792                                   | W-O <sub>c</sub> -W asym. str. |
| 715                 |                  | 716                                   | W-O <sub>c</sub> -W asym. str. |
| 471                 | 469              | 472                                   | Si-O bending                   |

<sup>a</sup> asym. str.: asymmetric stretching.**Table S3.** Assignments of <sup>29</sup>Si CP/MAS NMR spectra of H-SiW<sub>12</sub>, SiO<sub>2</sub> and H-SiW<sub>12</sub>/SiO<sub>2</sub>.

| H-SiW <sub>12</sub> /SiO <sub>2</sub> (ppm) | SiO <sub>2</sub> (ppm) | H-SiW <sub>12</sub> (ppm) | Assignment                                       |
|---------------------------------------------|------------------------|---------------------------|--------------------------------------------------|
| -86.032                                     |                        | -84.995                   | H <sub>4</sub> SiW <sub>12</sub> O <sub>40</sub> |
| -102.880                                    | -101.488               |                           | (SiO) <sub>3</sub> SiOH (Q <sup>3</sup> )        |
| -111.932                                    | -110.800               |                           | Si(OSi) <sub>4</sub> (Q <sup>4</sup> )           |

**Table S4.** The yields at different temperature and  $E_a$  for acetalization of various substrates with ethylene glycol catalyzed by H-SiW<sub>12</sub> under solvent-free conditions.<sup>a</sup>

| Entry | Alcohol                                                                             | Substrate                                                                           | Product                                                                             | Temperature (°C)                                                                    | Yield (%) | Activation energy (kJ·mol <sup>-1</sup> ) <sup>b</sup> |       |     |
|-------|-------------------------------------------------------------------------------------|-------------------------------------------------------------------------------------|-------------------------------------------------------------------------------------|-------------------------------------------------------------------------------------|-----------|--------------------------------------------------------|-------|-----|
| 1     |  |    |    | 25                                                                                  | 37        | 19.2                                                   |       |     |
| 2     |                                                                                     | X = H                                                                               | X = H                                                                               | 60                                                                                  | 73        |                                                        |       |     |
| 3     |                                                                                     | X = 2-Me                                                                            | X = 2-Me                                                                            | 25                                                                                  | 49        | 15.9                                                   |       |     |
| 4     |                                                                                     |                                                                                     |                                                                                     | 60                                                                                  | 81        |                                                        |       |     |
| 5     |                                                                                     | X = 3-Me                                                                            | X = 3-Me                                                                            | 25                                                                                  | 36        | 19.0                                                   |       |     |
| 6     |                                                                                     |                                                                                     |                                                                                     | 60                                                                                  | 73        |                                                        |       |     |
| 7     |                                                                                     | X = 2-Cl                                                                            | X = 2-Cl                                                                            | 25                                                                                  | 73        | 8.8                                                    |       |     |
| 8     |                                                                                     |                                                                                     |                                                                                     | 60                                                                                  | 95        |                                                        |       |     |
| 9     |                                                                                     | X = 3-Cl                                                                            | X = 3-Cl                                                                            | 25                                                                                  | 69        | 10.1                                                   |       |     |
| 10    |                                                                                     |                                                                                     |                                                                                     | 60                                                                                  | 90        |                                                        |       |     |
| 11    |                                                                                     | X = 4-Cl                                                                            | X = 4-Cl                                                                            | 25                                                                                  | 58        | 13.3                                                   |       |     |
| 12    |                                                                                     |                                                                                     |                                                                                     | 60                                                                                  | 80        |                                                        |       |     |
| 13    |                                                                                     | X = 2-Br                                                                            | X = 2-Br                                                                            | 25                                                                                  | 70        | 9.7                                                    |       |     |
| 14    |                                                                                     |                                                                                     |                                                                                     | 60                                                                                  | 93        |                                                        |       |     |
| 15    |                                                                                     | X = 3-Br                                                                            | X = 3-Br                                                                            | 25                                                                                  | 67        | 10.6                                                   |       |     |
| 16    |                                                                                     |                                                                                     |                                                                                     | 60                                                                                  | 85        |                                                        |       |     |
| 17    |                                                                                     | X = 4-Br                                                                            | X = 4-Br                                                                            | 25                                                                                  | 68        | 11.0                                                   |       |     |
| 18    |                                                                                     |                                                                                     |                                                                                     | 60                                                                                  | 89        |                                                        |       |     |
| 19    |                                                                                     | X = 2-NO <sub>2</sub>                                                               | X = 2-NO <sub>2</sub>                                                               | 25                                                                                  | 81        | 6.6                                                    |       |     |
| 20    |                                                                                     |                                                                                     |                                                                                     | 60                                                                                  | 93        |                                                        |       |     |
| 21    |                                                                                     | X = 3-NO <sub>2</sub>                                                               | X = 3-NO <sub>2</sub>                                                               | 25                                                                                  | 83        | 5.9                                                    |       |     |
| 22    |                                                                                     |                                                                                     |                                                                                     | 60                                                                                  | 94        |                                                        |       |     |
| 23    | X = 4-NO <sub>2</sub>                                                               | X = 4-NO <sub>2</sub>                                                               | 25                                                                                  | 86                                                                                  | 5.1       |                                                        |       |     |
| 24    |                                                                                     |                                                                                     | 60                                                                                  | >99.9                                                                               |           |                                                        |       |     |
| 25    |  |  | 25                                                                                  | 89                                                                                  | 4.2       |                                                        |       |     |
| 26    |                                                                                     |                                                                                     | R = <i>n</i> -C <sub>5</sub> H <sub>11</sub>                                        | R = <i>n</i> -C <sub>5</sub> H <sub>11</sub>                                        |           | 60                                                     | >99.9 |     |
| 27    |                                                                                     |                                                                                     | R = <i>n</i> -C <sub>6</sub> H <sub>13</sub>                                        | R = <i>n</i> -C <sub>6</sub> H <sub>13</sub>                                        |           | 25                                                     | 85    |     |
| 28    |                                                                                     |                                                                                     |                                                                                     |                                                                                     |           | 60                                                     | 98    |     |
| 29    |                                                                                     |                                                                                     | R = <i>n</i> -C <sub>7</sub> H <sub>15</sub>                                        | R = <i>n</i> -C <sub>7</sub> H <sub>15</sub>                                        |           | 25                                                     | 82    |     |
| 30    |                                                                                     |                                                                                     |                                                                                     |                                                                                     |           | 60                                                     | 99    |     |
| 31    |                                                                                     |                                                                                     | R = <i>n</i> -C <sub>8</sub> H <sub>17</sub>                                        | R = <i>n</i> -C <sub>8</sub> H <sub>17</sub>                                        |           | 25                                                     | 79    |     |
| 32    |                                                                                     |                                                                                     |                                                                                     |                                                                                     |           | 60                                                     | 99    |     |
| 33    |                                                                                     |                                                                                     | R = <i>n</i> -C <sub>9</sub> H <sub>19</sub>                                        | R = <i>n</i> -C <sub>9</sub> H <sub>19</sub>                                        |           | 25                                                     | 76    |     |
| 34    |                                                                                     |                                                                                     |                                                                                     |                                                                                     |           | 60                                                     | 98    |     |
| 35    |                                                                                     |                                                                                     |  |  |           | 25                                                     | 88    | 4.6 |
| 36    |                                                                                     |                                                                                     |                                                                                     |                                                                                     |           | 60                                                     | 97    |     |
| 37    |                                                                                     |                                                                                     |  |  |           | 25                                                     | 92    | 3.3 |
| 38    |                                                                                     |                                                                                     |                                                                                     |                                                                                     |           | 60                                                     | 94    |     |
| 39    |                                                                                     |                                                                                     |  |  |           | 25                                                     | 75    | 8.7 |
| 40    | 60                                                                                  | 99                                                                                  |                                                                                     |                                                                                     |           |                                                        |       |     |

<sup>a</sup> Reaction conditions: substrate (1 mmol), H-SiW<sub>12</sub> (0.25 mol% to substrate), ethylene glycol (1.5 mmol), 6 hours. Yields were determined by GC analysis using reference standards. Assignments of corresponding products were analyzed by <sup>1</sup>H-NMR. <sup>b</sup> These values have been calculated by Arrhenius equation:  $\ln k = (\ln A - E_a)/RT$ .

**Table S5.** Acetalization of various aldehydes and ketones with 1,3-propanediol catalyzed by H-SiW<sub>12</sub> at 60 °C under solvent-free conditions.<sup>a</sup>

| Entry | Donor                                                                               | Acceptor                                                                            | Product                                                                               | Yield(%) |
|-------|-------------------------------------------------------------------------------------|-------------------------------------------------------------------------------------|---------------------------------------------------------------------------------------|----------|
| 1     |                                                                                     |    |     | 95       |
| 2     |                                                                                     | X = 2-Me                                                                            | X = 2-Me                                                                              | 96       |
| 3     |                                                                                     | X = 3-Me                                                                            | X = 3-Me                                                                              | 96       |
| 4     |                                                                                     | X = 4-Me                                                                            | X = 4-Me                                                                              | 92       |
| 5     |                                                                                     | X = 2-MeO                                                                           | X = 2-MeO                                                                             | 87       |
| 6     |                                                                                     | X = 3-MeO                                                                           | X = 3-MeO                                                                             | 95       |
| 7     |                                                                                     | X = 4-MeO                                                                           | X = 4-MeO                                                                             | 75       |
| 8     |                                                                                     | X = 2-Cl                                                                            | X = 2-Cl                                                                              | 99       |
| 9     |                                                                                     | X = 3-Cl                                                                            | X = 3-Cl                                                                              | 99       |
| 10    |                                                                                     | X = 4-Cl                                                                            | X = 4-Cl                                                                              | 99       |
| 11    |                                                                                     | X = 2-Br                                                                            | X = 2-Br                                                                              | 99       |
| 12    |                                                                                     | X = 3-Br                                                                            | X = 3-Br                                                                              | 99       |
| 13    |  | X = 4-Br                                                                            | X = 4-Br                                                                              | 99       |
| 14    |                                                                                     | X = 2-NO <sub>2</sub>                                                               | X = 2-NO <sub>2</sub>                                                                 | >99.9    |
| 15    |                                                                                     | X = 3-NO <sub>2</sub>                                                               | X = 3-NO <sub>2</sub>                                                                 | >99.9    |
| 16    |                                                                                     | X = 4-NO <sub>2</sub>                                                               | X = 4-NO <sub>2</sub>                                                                 | 87       |
| 17    |                                                                                     |  |  | >99.9    |
| 18    |                                                                                     | R = <i>n</i> -C <sub>5</sub> H <sub>11</sub>                                        | R = <i>n</i> -C <sub>5</sub> H <sub>11</sub>                                          | 97       |
| 19    |                                                                                     | R = <i>n</i> -C <sub>6</sub> H <sub>13</sub>                                        | R = <i>n</i> -C <sub>6</sub> H <sub>13</sub>                                          | 95       |
| 20    |                                                                                     | R = <i>n</i> -C <sub>7</sub> H <sub>15</sub>                                        | R = <i>n</i> -C <sub>7</sub> H <sub>15</sub>                                          | 96       |
| 21    |                                                                                     | R = <i>n</i> -C <sub>8</sub> H <sub>17</sub>                                        | R = <i>n</i> -C <sub>8</sub> H <sub>17</sub>                                          | 92       |
| 22    |                                                                                     |  |  | 99       |
| 23    |                                                                                     |  |  | 85       |

<sup>a</sup> Reaction conditions: substrate (1 mmol), H-SiW<sub>12</sub> (0.25 mol% to substrate), 1,3-propanediol (1.5 mmol), 60 °C, 6 hours. Yields were determined by GC analysis using reference standards. Assignments of corresponding products were analyzed by <sup>1</sup>H-NMR.

**Table S6.** Acetalization of various aldehydes and ketones with 1,3-propanediol catalyzed by H-SiW<sub>12</sub>/SiO<sub>2</sub> at 60 °C under solvent-free conditions.<sup>a</sup>

| Entry | Donor                                                                               | Acceptor                                                                            | Product                                                                              | Yield(%) <sup>b</sup> |
|-------|-------------------------------------------------------------------------------------|-------------------------------------------------------------------------------------|--------------------------------------------------------------------------------------|-----------------------|
|       |                                                                                     |    |    |                       |
| 1     |                                                                                     | X = H                                                                               | X = H                                                                                | 95(91)                |
| 2     |                                                                                     | X = 2-Me                                                                            | X = 2-Me                                                                             | 96(94)                |
| 3     |                                                                                     | X = 3-Me                                                                            | X = 3-Me                                                                             | 96(93)                |
| 4     |                                                                                     | X = 4-Me                                                                            | X = 4-Me                                                                             | 92(89)                |
| 5     |                                                                                     | X = 2-MeO                                                                           | X = 2-MeO                                                                            | 87(83)                |
| 6     |                                                                                     | X = 3-MeO                                                                           | X = 3-MeO                                                                            | 95(90)                |
| 7     |                                                                                     | X = 4-MeO                                                                           | X = 4-MeO                                                                            | 75(71)                |
| 8     |                                                                                     | X = 2-Cl                                                                            | X = 2-Cl                                                                             | 99(97)                |
| 9     |                                                                                     | X = 3-Cl                                                                            | X = 3-Cl                                                                             | 99(98)                |
| 10    |                                                                                     | X = 4-Cl                                                                            | X = 4-Cl                                                                             | 99(96)                |
| 11    |                                                                                     | X = 2-Br                                                                            | X = 2-Br                                                                             | 99(98)                |
| 12    |                                                                                     | X = 3-Br                                                                            | X = 3-Br                                                                             | 99(96)                |
| 13    |  | X = 4-Br                                                                            | X = 4-Br                                                                             | 99(98)                |
| 14    |                                                                                     | X = 2-NO <sub>2</sub>                                                               | X = 2-NO <sub>2</sub>                                                                | >99.9(99)             |
| 15    |                                                                                     | X = 3-NO <sub>2</sub>                                                               | X = 3-NO <sub>2</sub>                                                                | >99.9(99)             |
| 16    |                                                                                     | X = 4-NO <sub>2</sub>                                                               | X = 4-NO <sub>2</sub>                                                                | 87(84)                |
|       |                                                                                     |  |  |                       |
| 17    |                                                                                     | R = <i>n</i> -C <sub>5</sub> H <sub>11</sub>                                        | R = <i>n</i> -C <sub>5</sub> H <sub>11</sub>                                         | >99.9(99)             |
| 18    |                                                                                     | R = <i>n</i> -C <sub>6</sub> H <sub>13</sub>                                        | R = <i>n</i> -C <sub>6</sub> H <sub>13</sub>                                         | 97(94)                |
| 19    |                                                                                     | R = <i>n</i> -C <sub>7</sub> H <sub>15</sub>                                        | R = <i>n</i> -C <sub>7</sub> H <sub>15</sub>                                         | 95(92)                |
| 20    |                                                                                     | R = <i>n</i> -C <sub>8</sub> H <sub>17</sub>                                        | R = <i>n</i> -C <sub>8</sub> H <sub>17</sub>                                         | 96(94)                |
| 21    |                                                                                     | R = <i>n</i> -C <sub>9</sub> H <sub>19</sub>                                        | R = <i>n</i> -C <sub>9</sub> H <sub>19</sub>                                         | 92(88)                |
| 22    |                                                                                     |  |  | 99(96)                |
| 23    |                                                                                     |  |  | 85(81)                |

<sup>a</sup> Reaction conditions: substrate (1 mmol), H-SiW<sub>12</sub>/SiO<sub>2</sub> (0.0225 mol% to substrate), 1,3-propanediol (1.5 mmol), 60 °C, 6 hours. Yields were determined by GC analysis using reference standards. Assignments of corresponding products were analyzed by <sup>1</sup>H-NMR. <sup>b</sup> The values in parentheses are the isolated yields.

**Table S7.** ICP analysis of reaction filtrate before and after reaction catalyzed by H-SiW<sub>12</sub>.<sup>a</sup>

| Reaction filtrate | Si (ppm) | W (ppm) |
|-------------------|----------|---------|
| Before reaction   | <0.01    | <0.01   |
| After reaction    | 0.04     | 0.49    |

<sup>a</sup> Reaction conditions: benzaldehyde (1 mmol), H-SiW<sub>12</sub> (0.25 mol% to substrate), 1,3-propanediol (1.5 mmol), 60 °C, 6 hours.

**Table S8.** ICP analysis of reaction filtrate before and after reaction catalyzed by H-SiW<sub>12</sub>/SiO<sub>2</sub>.<sup>a</sup>

| Reaction filtrate | Si (ppm) | W (ppm) |
|-------------------|----------|---------|
| Before reaction   | <0.01    | <0.01   |
| After reaction    | <0.01    | <0.01   |

<sup>a</sup> Reaction conditions: benzaldehyde (1 mmol), H-SiW<sub>12</sub>/SiO<sub>2</sub> (0.0225 mol% to substrate), 1,3-propanediol (1.5 mmol), 60 °C, 6 hours.

**Table S9.** H-SiW<sub>12</sub>/SiO<sub>2</sub>-recycling and reusing experiments of acetalization of benzaldehyde with 1,3-propanediol.<sup>a</sup>

| Entry | Recycle time | Catalyst                              | Yield (%) | Catalyst Recovery (%) |
|-------|--------------|---------------------------------------|-----------|-----------------------|
| 1     | 1            | H-SiW <sub>12</sub> /SiO <sub>2</sub> | 94        | 98                    |
| 2     | 2            | H-SiW <sub>12</sub> /SiO <sub>2</sub> | 94        | 98                    |
| 3     | 3            | H-SiW <sub>12</sub> /SiO <sub>2</sub> | 94        | 98                    |
| 4     | 4            | H-SiW <sub>12</sub> /SiO <sub>2</sub> | 94        | 98                    |
| 5     | 5            | H-SiW <sub>12</sub> /SiO <sub>2</sub> | 94        | 97                    |
| 6     | 6            | H-SiW <sub>12</sub> /SiO <sub>2</sub> | 94        | 97                    |
| 7     | 7            | H-SiW <sub>12</sub> /SiO <sub>2</sub> | 93        | 97                    |
| 8     | 8            | H-SiW <sub>12</sub> /SiO <sub>2</sub> | 93        | 96                    |
| 9     | 9            | H-SiW <sub>12</sub> /SiO <sub>2</sub> | 93        | 96                    |
| 10    | 10           | H-SiW <sub>12</sub> /SiO <sub>2</sub> | 93        | 96                    |

<sup>a</sup> Reaction conditions: benzaldehyde (1 mmol), H-SiW<sub>12</sub>/SiO<sub>2</sub> (0.0225 mol% to benzaldehyde), 1,3-propanediol (1.5 mmol), 60 °C, 6 hours. Yields were determined by GC analysis using reference standards. Assignments of corresponding products were analyzed by <sup>1</sup>H-NMR.

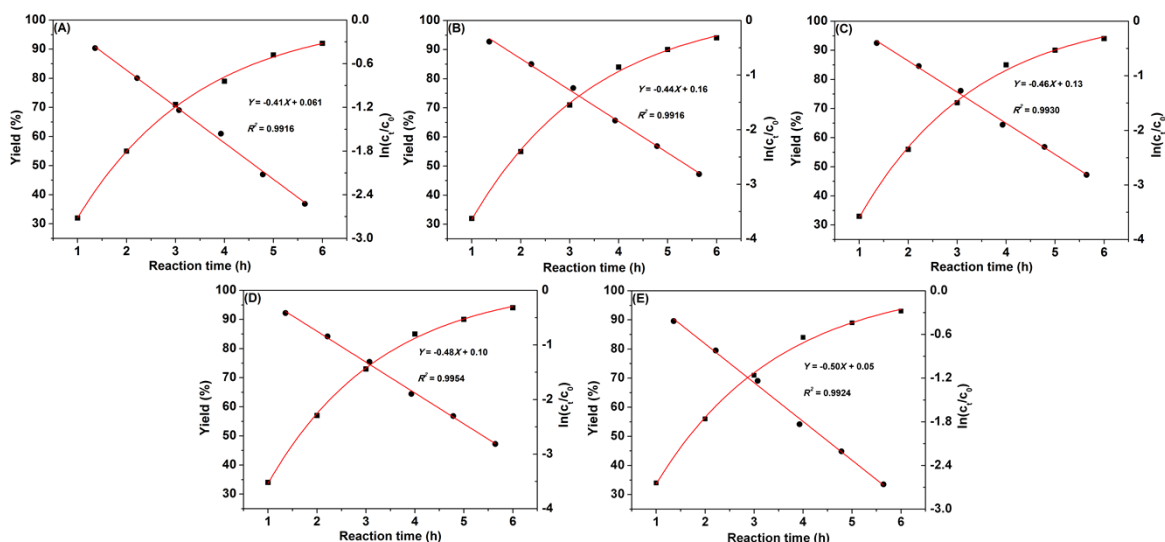

**Figure S1.** Yield and  $\ln(C_t/C_0)$  as functions of reaction time at (A) 25 °C, (B) 40 °C, (C) 50 °C, (D) 60 °C and (E) 70 °C. Reaction conditions: cyclohexanone (1 mmol), H-SiW<sub>12</sub> (0.25 mol% to cyclohexanone), ethylene glycol (1.5 mmol), 6 hours.

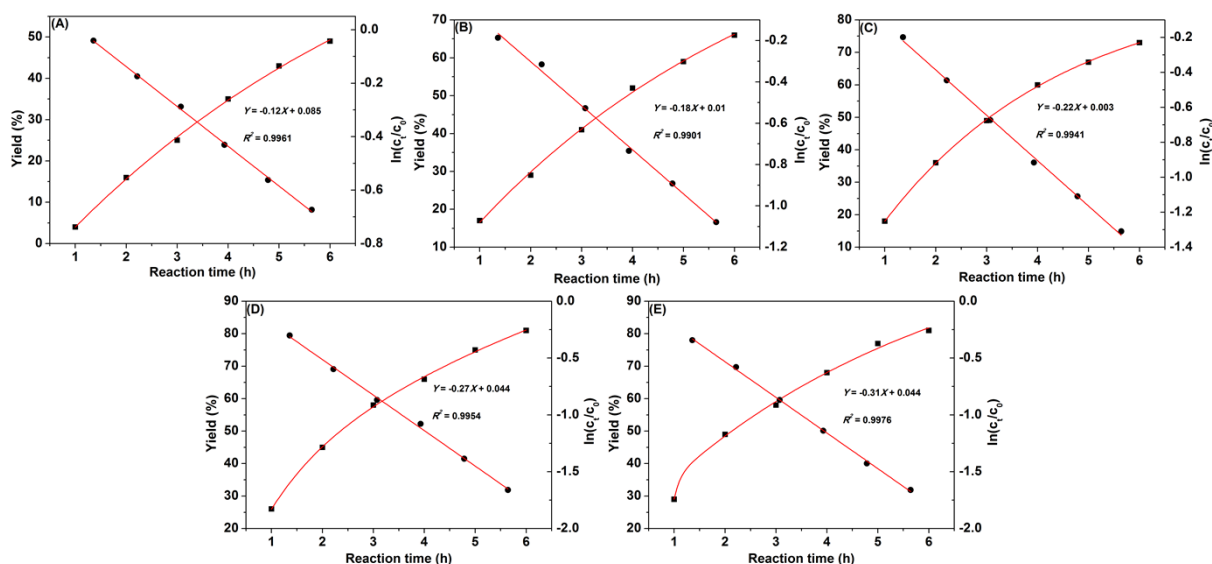

**Figure S2.** Yield and  $\ln(C_t/C_0)$  as functions of reaction time at (A) 25 °C, (B) 40 °C, (C) 50 °C, (D) 60 °C and (E) 70 °C. Reaction conditions: 2-methylbenzaldehyde (1 mmol), H-SiW<sub>12</sub> (0.25 mol% to 2-methylbenzaldehyde), ethylene glycol (1.5 mmol), 6 hours.

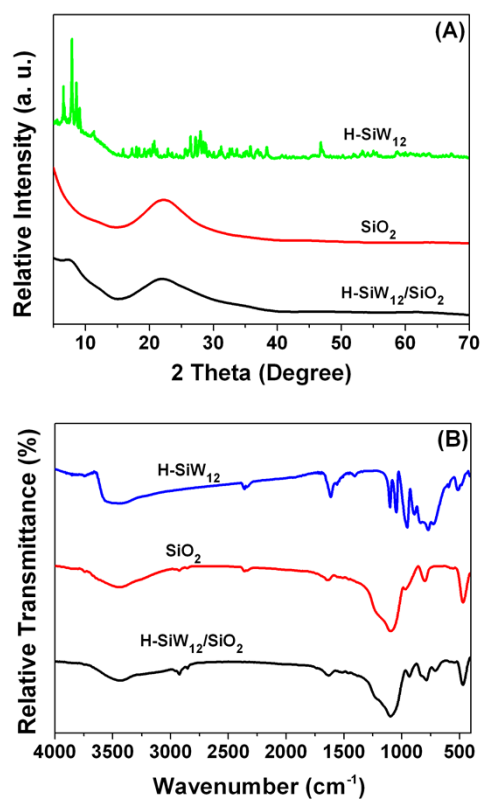

**Figure S3.** Powder XRD patterns (A) and FT-IR spectra (B) of H-SiW<sub>12</sub>/SiO<sub>2</sub>, SiO<sub>2</sub> and H-SiW<sub>12</sub>.

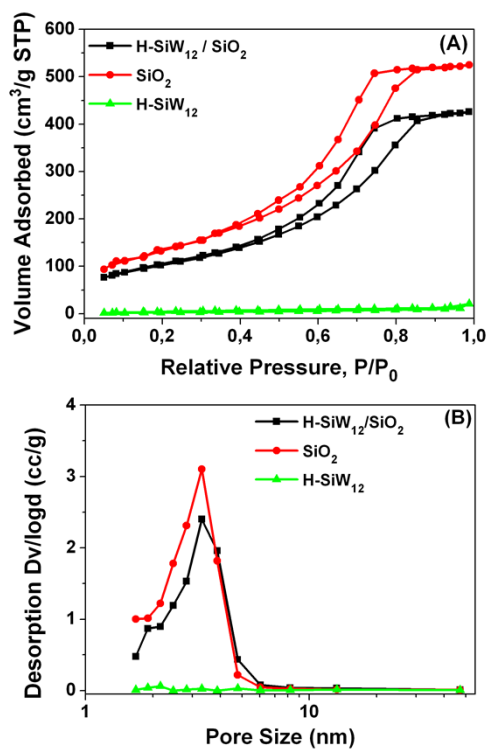

**Figure S4.** Adsorption-desorption isotherms (A) and pore size distribution curves (B) of H-SiW<sub>12</sub>/SiO<sub>2</sub>, SiO<sub>2</sub> and H-SiW<sub>12</sub>.



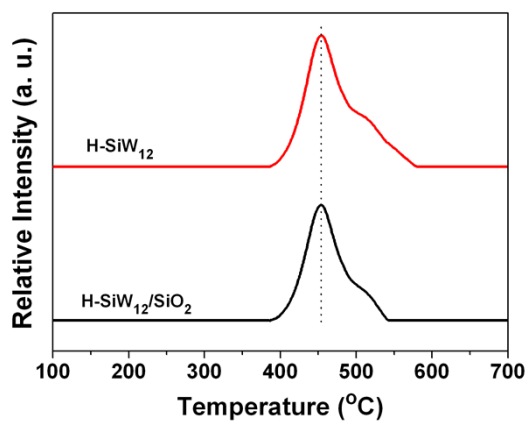

**Figure S5.** NH<sub>3</sub>-TPD profiles of H-SiW<sub>12</sub>/SiO<sub>2</sub> and H-SiW<sub>12</sub>.

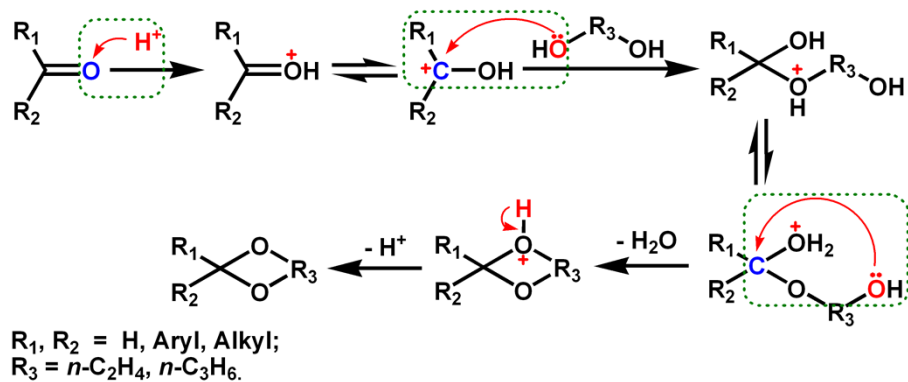

**Figure S6.** The proposed mechanism of acetalization of aldehydes and ketones with diols (ethylene glycol and 1,3-propanediol) catalyzed by H-SiW<sub>12</sub> and H-SiW<sub>12</sub>/SiO<sub>2</sub>.
